# Supplementary material for: Immunogenicity and Protection from Receptor-Binding Domains of Toxins as Potential Vaccine Candidates for Clostridium difficile
Source: MDPI journal article supplement (doi:10.3390/vaccines7040180), 2019-11-08
Supplement: s1 [file s1]

## Supplementary Materials

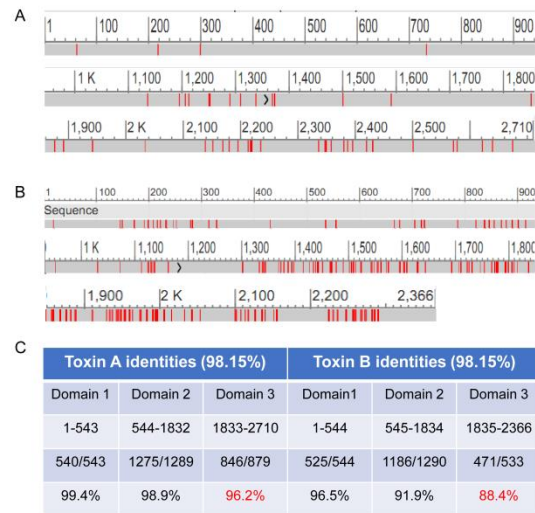

**Figure S1.** Blast results of toxin amino acids sequence in CD bacterium strain VPI10463 and strain ATCC BAA-1870. **(A)** Toxin A; **(B)** Toxin B; **(C)** The complete toxin A and toxin B. Red parts in A and B are different amino acids. Domain 3 is RBD of toxin.
